# Supplementary material
Source: Royal Society of Chemistry journal article supplement (doi:10.1039/d6tb00178e)
Supplement: d6tb00178e1.pdf [file d6tb00178e1.pdf]

## Supporting Information

### **Bio-inspired Metamaterial Structure Small-Diameter Vascular Grafts for Emulation of Native Arterial Mechanics**

Xianhui Cai<sup>1</sup>, Zhongfei Zou<sup>2,\*</sup>, Zhen Shen<sup>1</sup>, Rui Guo<sup>1</sup>, Xiong Yu<sup>1</sup>, Xuanrong Zhu<sup>1</sup>, Li Shen<sup>3</sup>, Jiachun Li<sup>1,\*</sup>,  
Yuewei Chen<sup>1,3,4,\*</sup>

<sup>1</sup> School of Mechanical Engineering, Guizhou University, Guiyang, 550025, China.

<sup>2</sup> School of Mechanical Engineering, Guizhou Institute of Technology, Guiyang, 550003, China.

<sup>3</sup> State Key Laboratory of Cardiovascular Diseases, Zhongshan Hospital, Fudan University, Shanghai, 200032, China.

<sup>4</sup> State Key Laboratory of Fluid Power and Mechatronic Systems & Liangzhu Laboratory, School of Mechanical Engineering, Zhejiang University, Hangzhou, 310027, China.

\* Corresponding authors.

E-mail: [zouzhongfei@git.edu.cn](mailto:zouzhongfei@git.edu.cn) (Zhongfei Zou)

E-mail: [ywchen3@gzu.edu.cn](mailto:ywchen3@gzu.edu.cn) (Yuewei Chen)

E-mail: [jcli@gzu.edu.cn](mailto:jcli@gzu.edu.cn) (Jiachun Li)

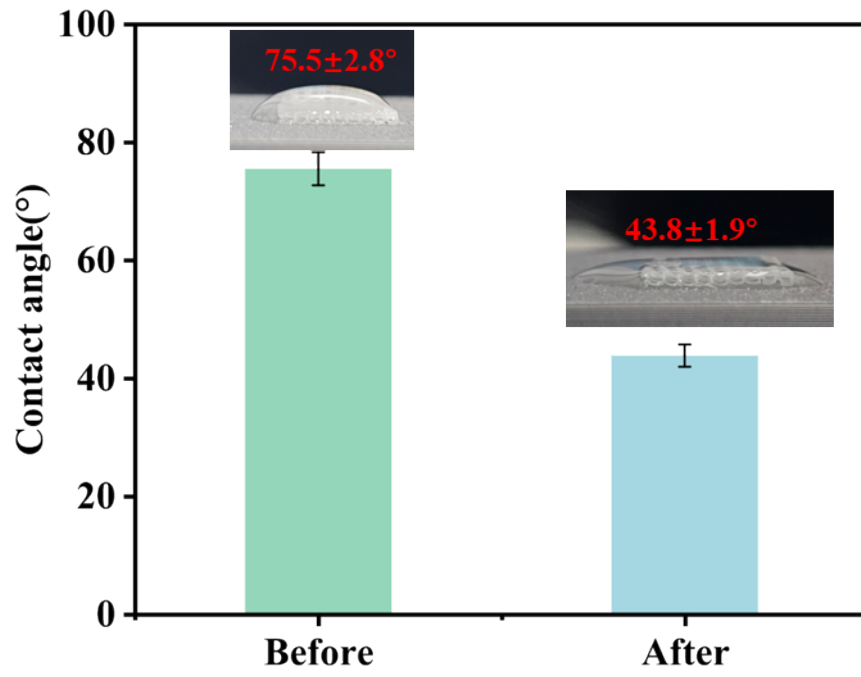

**Figure S1.** Water contact angles on PCL scaffold before and after NaOH treatment. Data are presented as the mean  $\pm$  SD. n = 3.

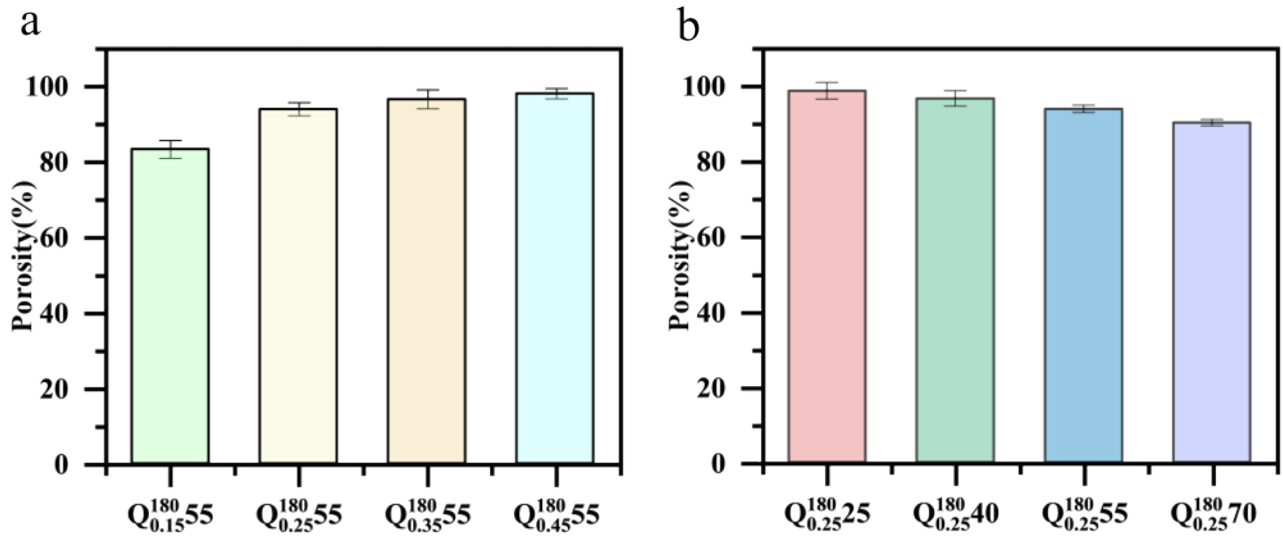

**Figure S2.** Porosity of negative Poisson's ratio tubular scaffolds under different parameters(a) Different fiber arc radii(b) Different fiber diameters.

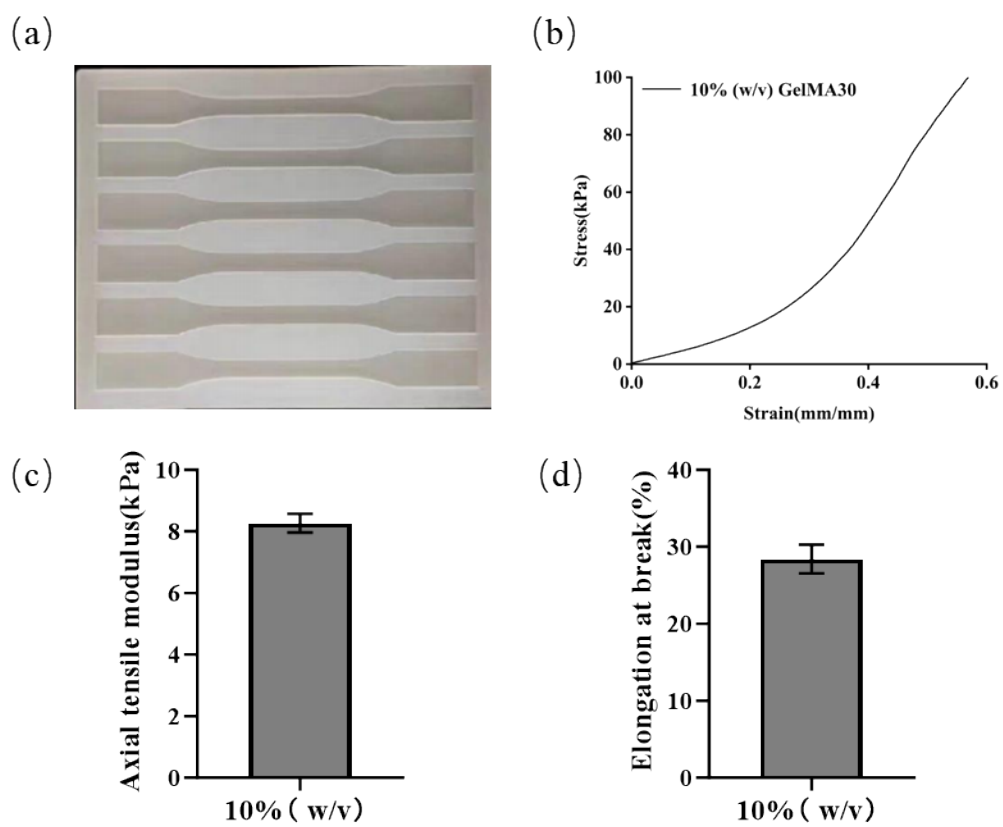

**Figure S3.**(a) Hydrogel dumbbell-shaped tensile mold. Mechanical properties of GelMA hydrogel : (b) Stress-strain curves (c) Tensile modulus (d) Elongation at break.

**Figure S4.** Poisson's ratio of the negative Poisson's ratio tubular fiber network: (a) Poisson's ratio at different fiber arc radii;  
(b) Poisson's ratio at different fiber diameters.

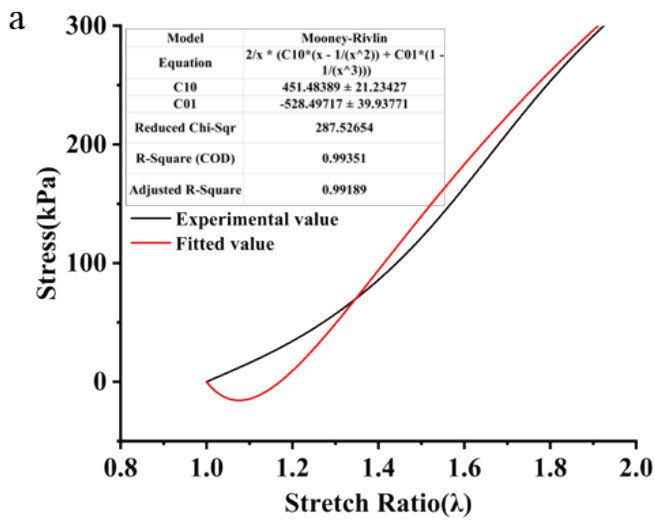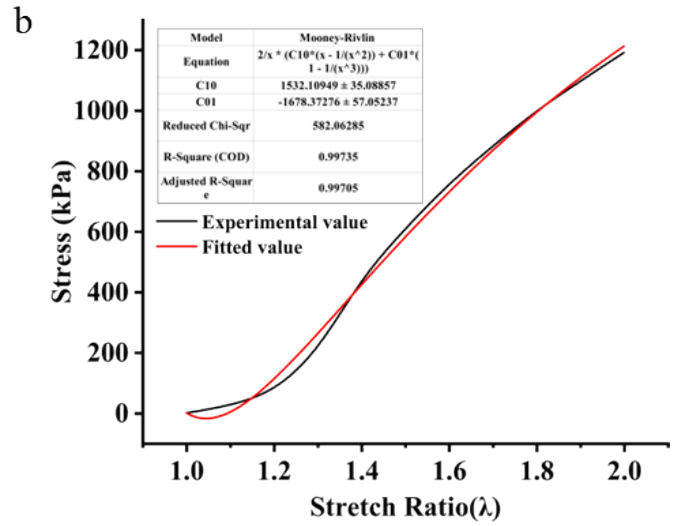

**Figure S5.** The Mooney-Rivlin model's fitting results for the uniaxial tensile mechanical behavior of superelastic materials:

(a) 10% (w/v) hydrogel and (b) PCL material
